# Supplementary material for: A polyphosphazene elastomer containing 2,2,2-trifluoroethoxy groups as a dielectric in electrically responsive soft actuators
Source: Royal Society of Chemistry journal article supplement (doi:10.1039/d4tc02369b), 2024-01-01
Supplement: d4tc02369b1.pdf [file d4tc02369b1.pdf]

## Supporting Information

### A polyphosphazene elastomer containing 2,2,2-trifluoroethoxy groups as a dielectric in electrically responsive soft actuators

*Cansu Zeytun Karaman<sup>a,b</sup>, Thulasinath Raman Venkatesan<sup>a</sup>, Johannes von Szczepanski<sup>a,c</sup>, Frank A. Nüesch<sup>a,b</sup>, and Dorina M. Opris<sup>a,c\*</sup>*

*<sup>a</sup>Functional Polymers, Empa, Swiss Federal Laboratories for Materials Science and Technology (EMPA), 8600 Duebendorf, Switzerland.*

*<sup>b</sup>Ecole Polytechnique Federale de Lausanne (EPFL), 1015 Lausanne, Switzerland*

*<sup>c</sup>Eidgenössische Technische Hochschule Zürich (ETHZ), 8092 Zurich, Switzerland*

E-mail: dorina.opris@empa.ch

## Contents

|                                            |   |
|--------------------------------------------|---|
| NMR Spectra.....                           | 2 |
| GPC Spectrum .....                         | 2 |
| FTIR Spectra .....                         | 3 |
| DSC Spectra .....                          | 4 |
| TGA Spectra.....                           | 4 |
| Dielectric Spectra.....                    | 5 |
| Actuation Measurements.....                | 5 |
| Weibull probability plot.....              | 8 |
| Calculation of electrostatic pressure..... | 8 |
| References .....                           | 8 |

## NMR Spectra

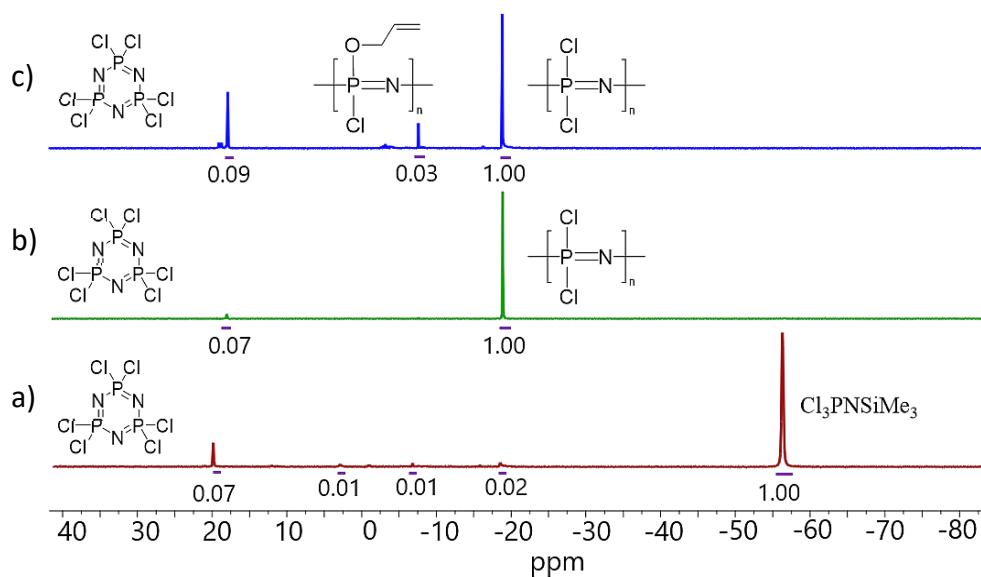

**Figure S1.**  $^{31}\text{P}\{^1\text{H}\}$  NMR spectra (CDCl<sub>3</sub>) of monomer  $\text{Cl}_3\text{PNSiMe}_3$  with cyclohexachlorotriphosphazene (0.7 %<) and some oligomer impurities (0.2 %<) (a); polymer with cyclohexachlorotriphosphazene (0.7 %<) impurity (b); polymer after allyl alkoxide substitution (c).

## GPC Spectrum

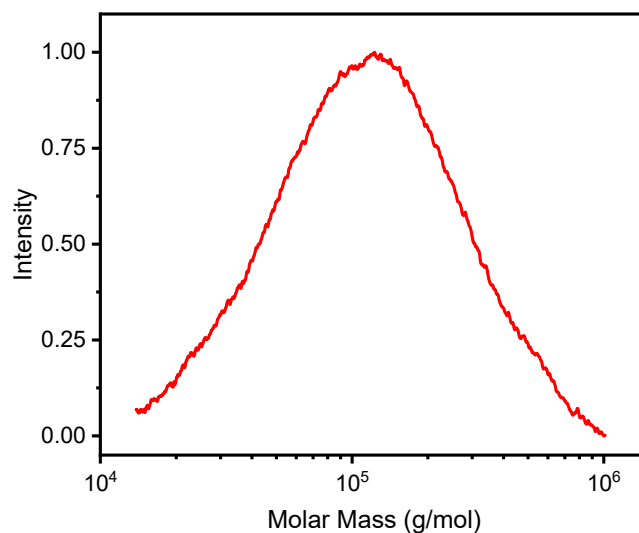

**Figure S2.** GPC elugram of poly[bis(2,2,2-trifluoroethoxy)]phosphazene.

**Table S1.** The molar mass and molar mass distributions result from GPC characterization.

| Sample                                      | $M_n$ (g/mol) | $M_w$ (g/mol) | PDI   |
|---------------------------------------------|---------------|---------------|-------|
| poly[bis(2,2,2-trifluoroethoxy)]phosphazene | 71926         | 149189        | 2.074 |

The polymer was synthesized by cationic polymerization of monomer  $\text{Cl}_3\text{PNSiMe}_3$  in the presence of  $\text{PCl}_5$  initiator. In general, the molecular weight is in the range of  $10^5$  g/mol with a polydispersity index of 1.2 to 2.5.<sup>1</sup>

## FTIR Spectra

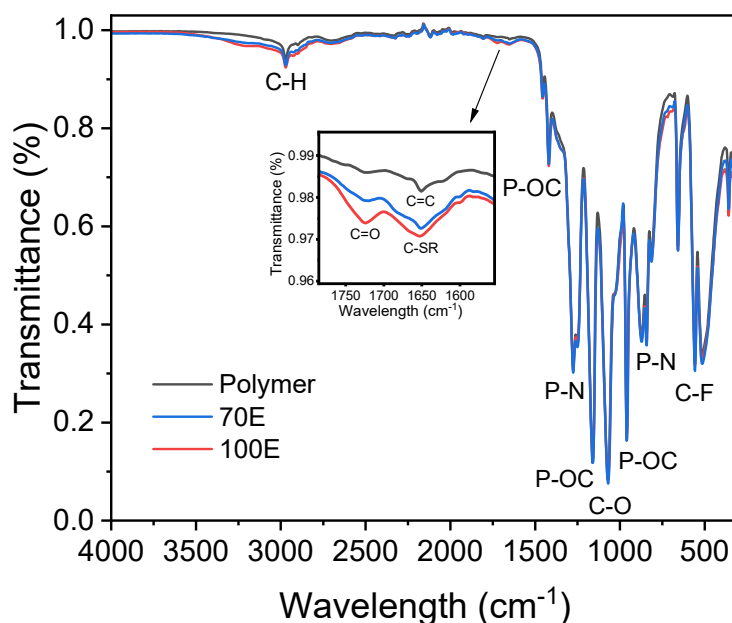

**Figure S3.** FTIR spectra of the poly[bis(2,2,2-trifluoroethoxy)]phosphazene, **E70** and **E100**.

FTIR spectra were used to determine the functional groups of the polymer and elastomers. Polyphosphazene backbone P-N-P shows an asymmetric stretching peak between 1200 and 1400  $\text{cm}^{-1}$ . In general, electro-negative side groups raise the strength of the P-N bond and increase the vibrational frequency. The  $\text{OCH}_2\text{CF}_3$  substituted P-N asymmetric stretching band was observed at 1270  $\text{cm}^{-1}$ .<sup>2</sup> The symmetric P-N-P stretching appeared at 833  $\text{cm}^{-1}$ . P-O-C band was observed at 1416  $\text{cm}^{-1}$ , 1163  $\text{cm}^{-1}$ , and 955  $\text{cm}^{-1}$ .<sup>3</sup> The peaks at 2972  $\text{cm}^{-1}$  belong to the aliphatic C-H bond, at 573  $\text{cm}^{-1}$  belong to the C-F bond, and at 1066  $\text{cm}^{-1}$  is associated to the C-O bond stretching of the side group.<sup>4</sup> Additionally, the allyl peak of the polymer appears at 1650  $\text{cm}^{-1}$ . Peaks corresponding to C-SR at 1653  $\text{cm}^{-1}$  and C=O at 1724  $\text{cm}^{-1}$  were observed after the thiol-ene addition reaction with the tetrakis(3-mercaptopropionate) crosslinker. No -SH peaks were detected in the region of 2600 – 2550  $\text{cm}^{-1}$ , indicating that all thiol groups were consumed in the thiol-ene addition reaction.

## DSC Spectra

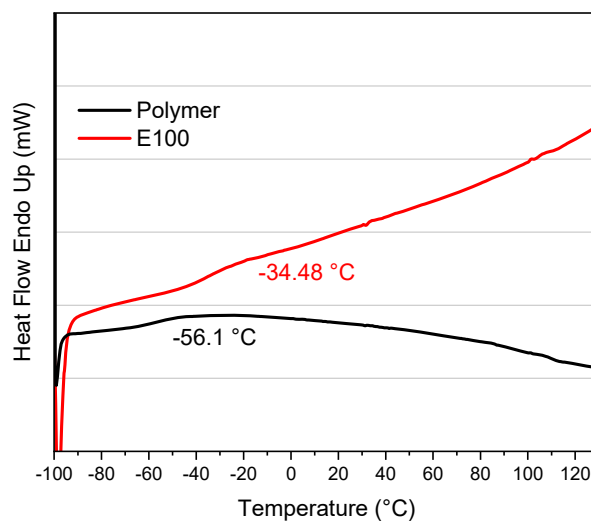

**Figure S4.** DSC graph of the poly[bis(2,2,2-trifluoroethoxy)]phosphazene, and **E100**.

Differential Scanning Calorimetry was employed to determine the glass transition temperature of both the polymer and the cross-linked material. Upon comparison, it was observed that the polymer exhibits a lower T<sub>g</sub> than the cross-linked material, indicating reduced flexibility in the latter due to the presence of a network structure..

## TGA Spectra

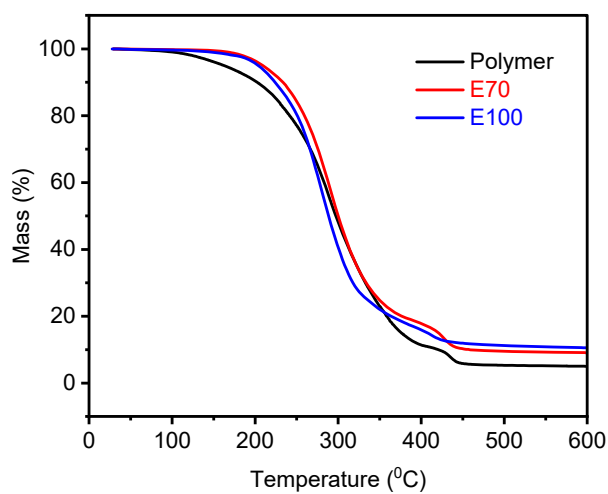

**Figure S5.** TGA graph of the poly[bis(2,2,2-trifluoroethoxy)]phosphazene, **E70** and **E100**.

Thermogravimetric analysis (TGA) was conducted using a Perkin Elmer TGA7 with a heating rate of  $10\text{ }^{\circ}\text{C min}^{-1}$  under a nitrogen gas flow. TGA was performed to analyze the thermal stability and decomposition behavior of the polymer and the films. The analysis revealed that polymer decomposition was initiated below  $160\text{ }^{\circ}\text{C}$ . In contrast, this occurred at elevated temperatures for the elastomers, which can be attributed to the necessity of higher temperatures to disrupt the cross-linked network. The principal weight loss was observed below  $350\text{ }^{\circ}\text{C}$  due to the materials' decomposing into cyclic species.<sup>5,6</sup>

## Dielectric Spectra

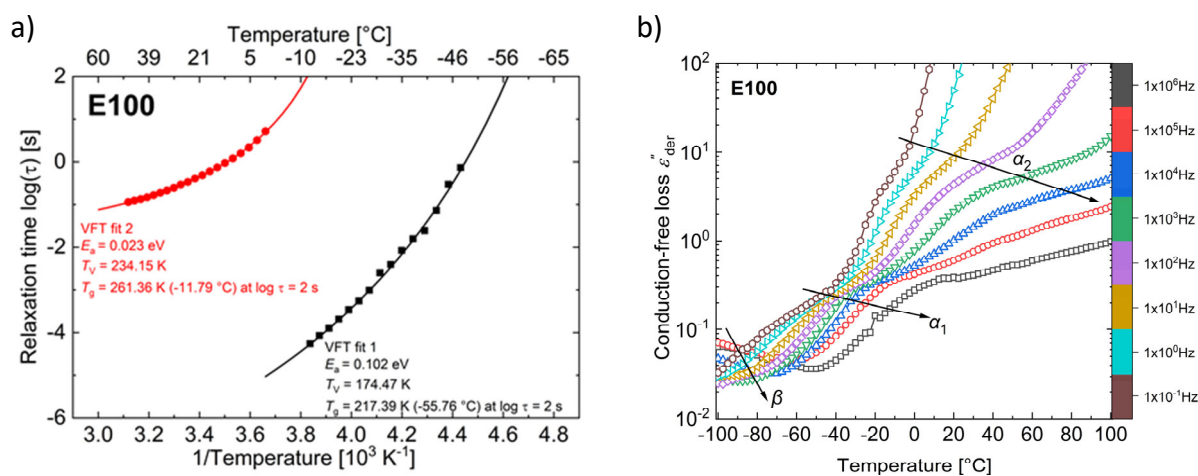

**Figure S6.** a) Arrhenius relaxation plot with VFT fits for **E100**, b) isochronal representation of the conduction-free dielectric loss ( $\epsilon''_{\text{der}}$ ) calculated for **E100** sample between  $10^{-1}$  and  $10^6$  Hz.

## Actuation Measurements

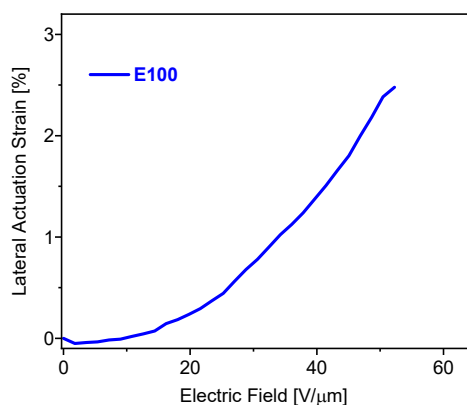

**Figure S7.** Lateral actuation strain of **E100** at different electric fields.

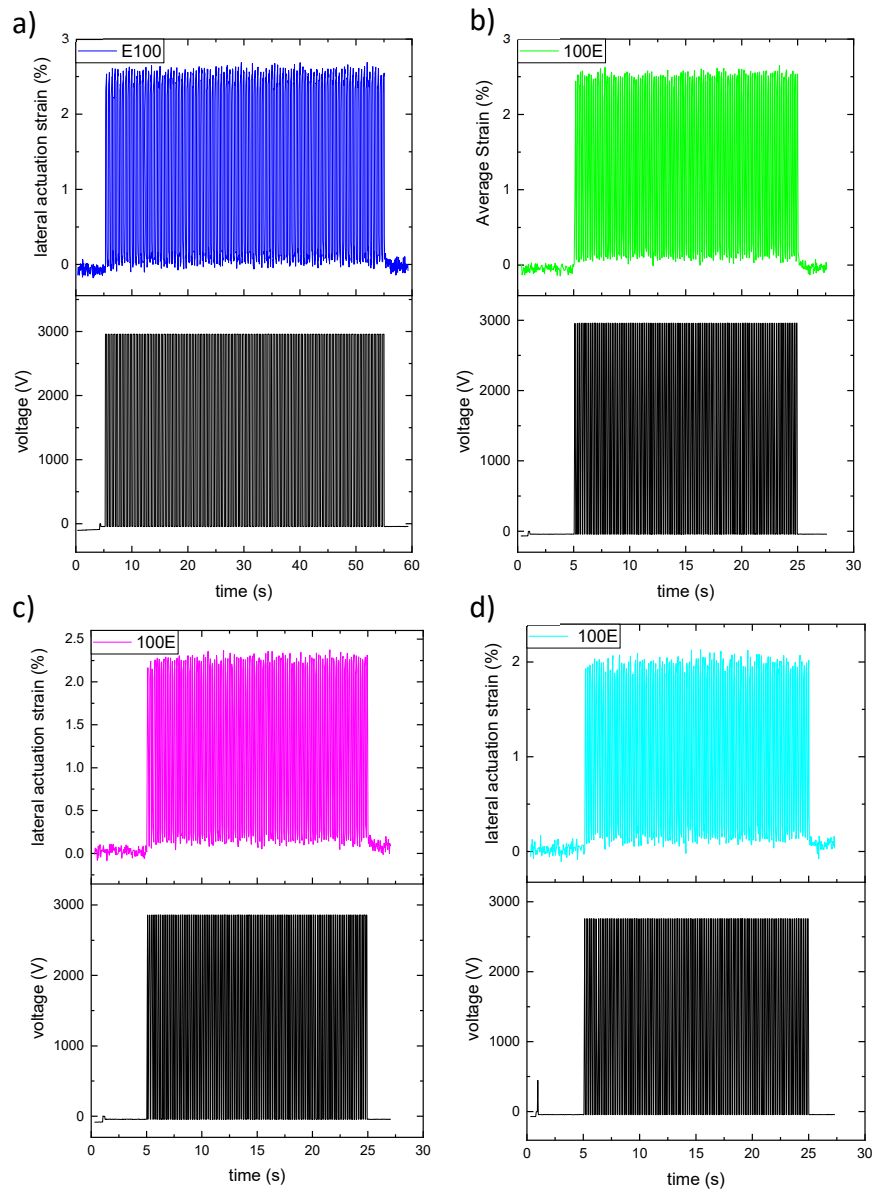

**Figure S8.** An actuator constructed from a 55  $\mu\text{m}$  thick E100 film exposed to an electric field of 52  $\text{V}/\mu\text{m}$  and varying frequencies of 1, 2, 4, and 10 Hz for 100 cycles, respectively, exhibited stable and reversible actuation.

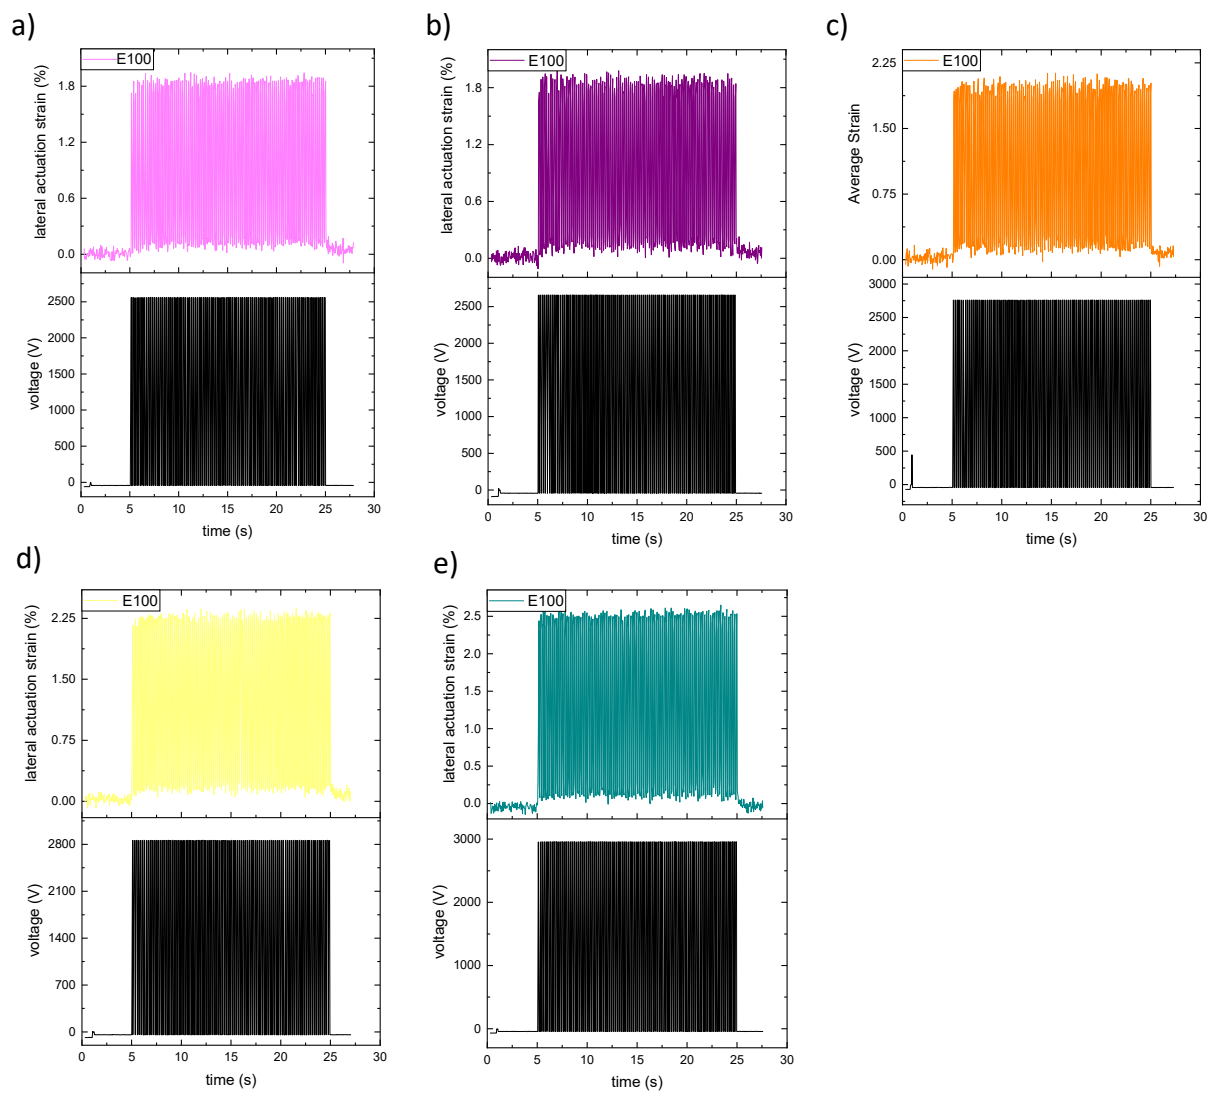

**Figure S9.** Film 100E, 55  $\mu\text{m}$  thick, subjected to different voltages of: a) 2600 V; b) 2700 V; c) 2800 V; d) 2900 V and e) 3000 V at 0.1 s for 100 cycle.

## Weibull probability plot

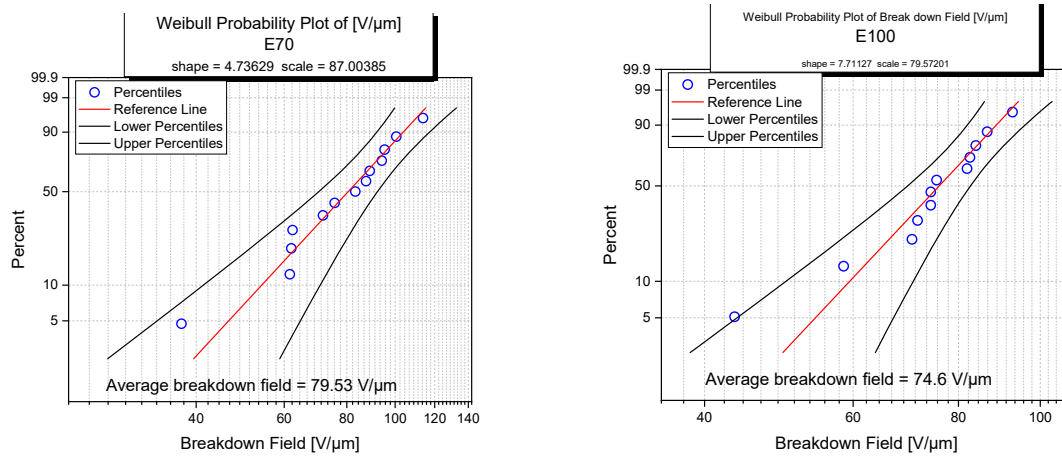

**Figure S10.** Weibull probability plot of a) **E70** and b) **E100**

## Calculation of electrostatic pressure

The electrostatic pressure acting on the films is  $p = \varepsilon' \varepsilon_0 E^2$  where  $p$  is pressure,  $E$  is electric field and,  $\varepsilon'$  and  $\varepsilon_0$  represents relative, and free-space ( $\varepsilon_0 = 8.854187817 \times 10^{-12}$  F/m) permittivity, respectively

The  $p$  is calculated as:

0.32 MPa for **E70** ( $80 \text{ V } \mu\text{m}^{-1}$ ,  $\varepsilon' = 5.65$ ) and

0.17 MPa for Elastosil ( $85 \text{ V } \mu\text{m}^{-1}$ ,  $\varepsilon' = 3.00$ ).<sup>7</sup>

## References

- 1 H. R. Allcock, C. A. Crane, C. T. Morrissey, J. M. Nelson, S. D. Reeves, C. H. Honeyman and I. Manners, *Macromolecules*, 1996, **29**, 7740–7747.
- 2 R. E. Singler, N. S. Schneider and G. L. Hagnauer, *Polym. Eng. Sci.*, 1975, **15**, 321–338.
- 3 H. R. Allcock, R. L. Kugel and K. J. Valan, *Inorg. Chem.*, 1966, **5**, 1709–1715.
- 4 H. R. Allcock, J. S. Rutt and R. J. Fitzpatrick, *Chem. Mater.*, 1991, **3**, 442–449.
- 5 Z. Tian, A. Hess, C. R. Fellin, H. Nulwala and H. R. Allcock, *Macromolecules*, 2015, **48**, 4301–4311.
- 6 M. Zeldin, W. H. Jo and E. M. Pearce, *J. Polym. Sci. Polym. Chem. Ed.*, 1981, **19**, 917–923.
- 7 R. Pelrine, R. Kornbluh, J. Joseph, R. Heydt, Q. Pei and S. Chiba, *Mater. Sci. Eng. C*, 2000, **11**, 89–100.
